# Supplementary material for: The Role of Complement in HSCT-TMA: Basic Science to Clinical Practice
Source: PubMed Central journal article supplement — Adv Ther. 2022 Jul 4;39(9):3896–915. doi: 10.1007/s12325-022-02184-4 (PMC9402756; doi:10.1007/s12325-022-02184-4), 2022-07-04
Supplement: 12325_2022_2184_MOESM1_ESM.pdf [file 12325_2022_2184_MOESM1_ESM.pdf]

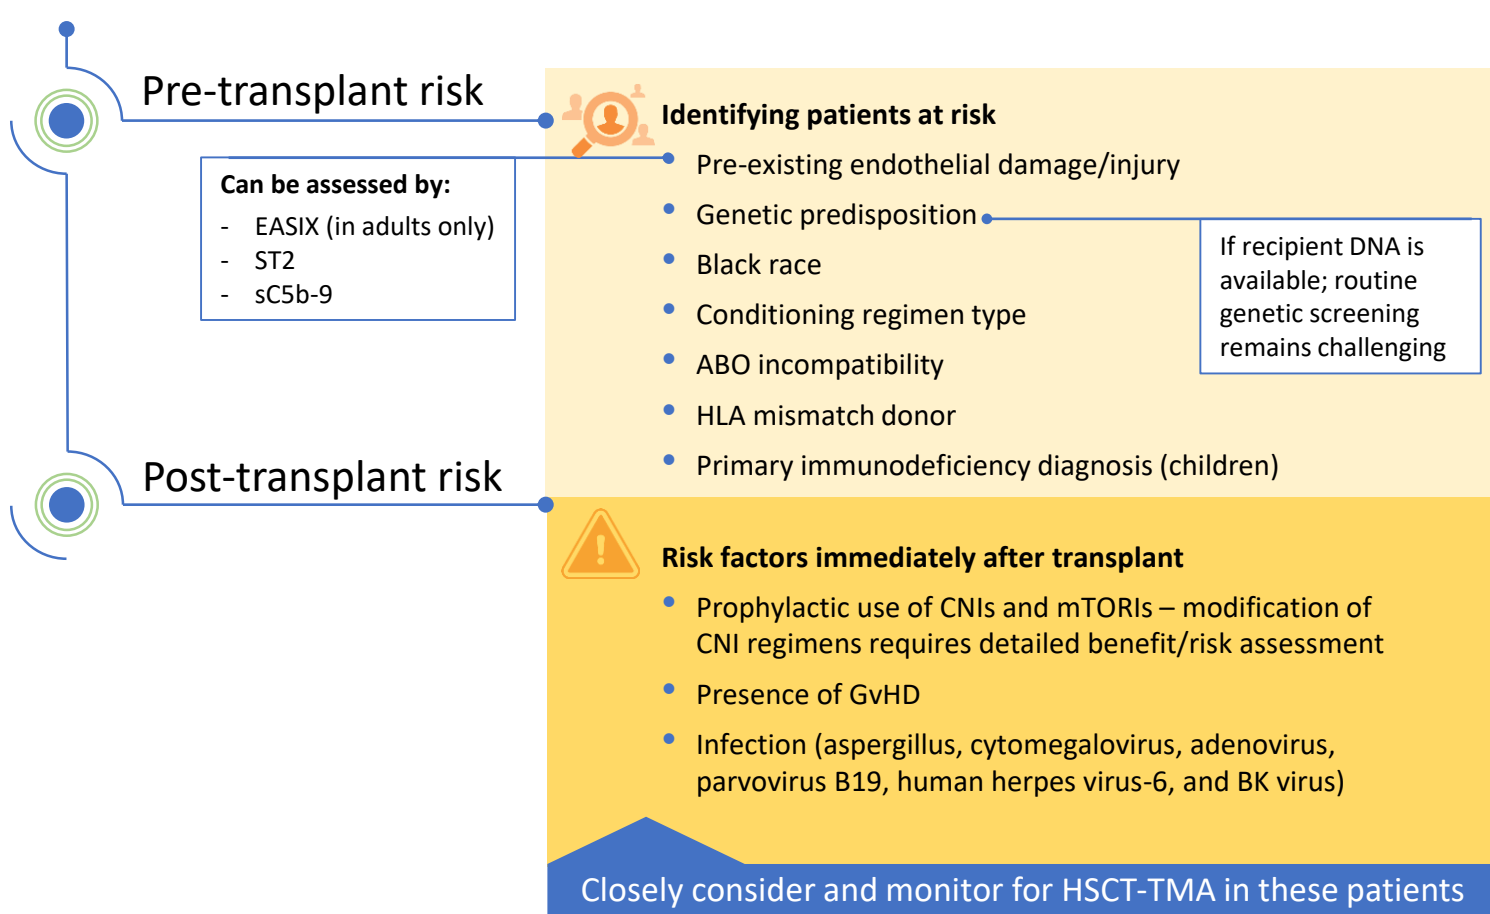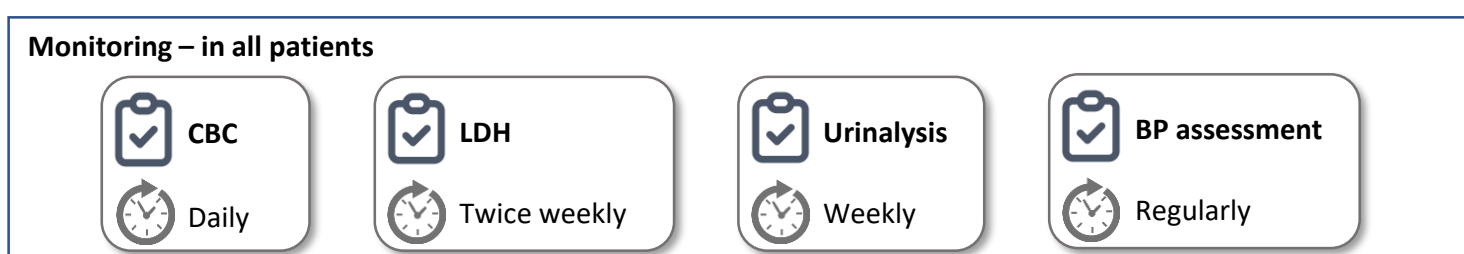

### TMA diagnosis

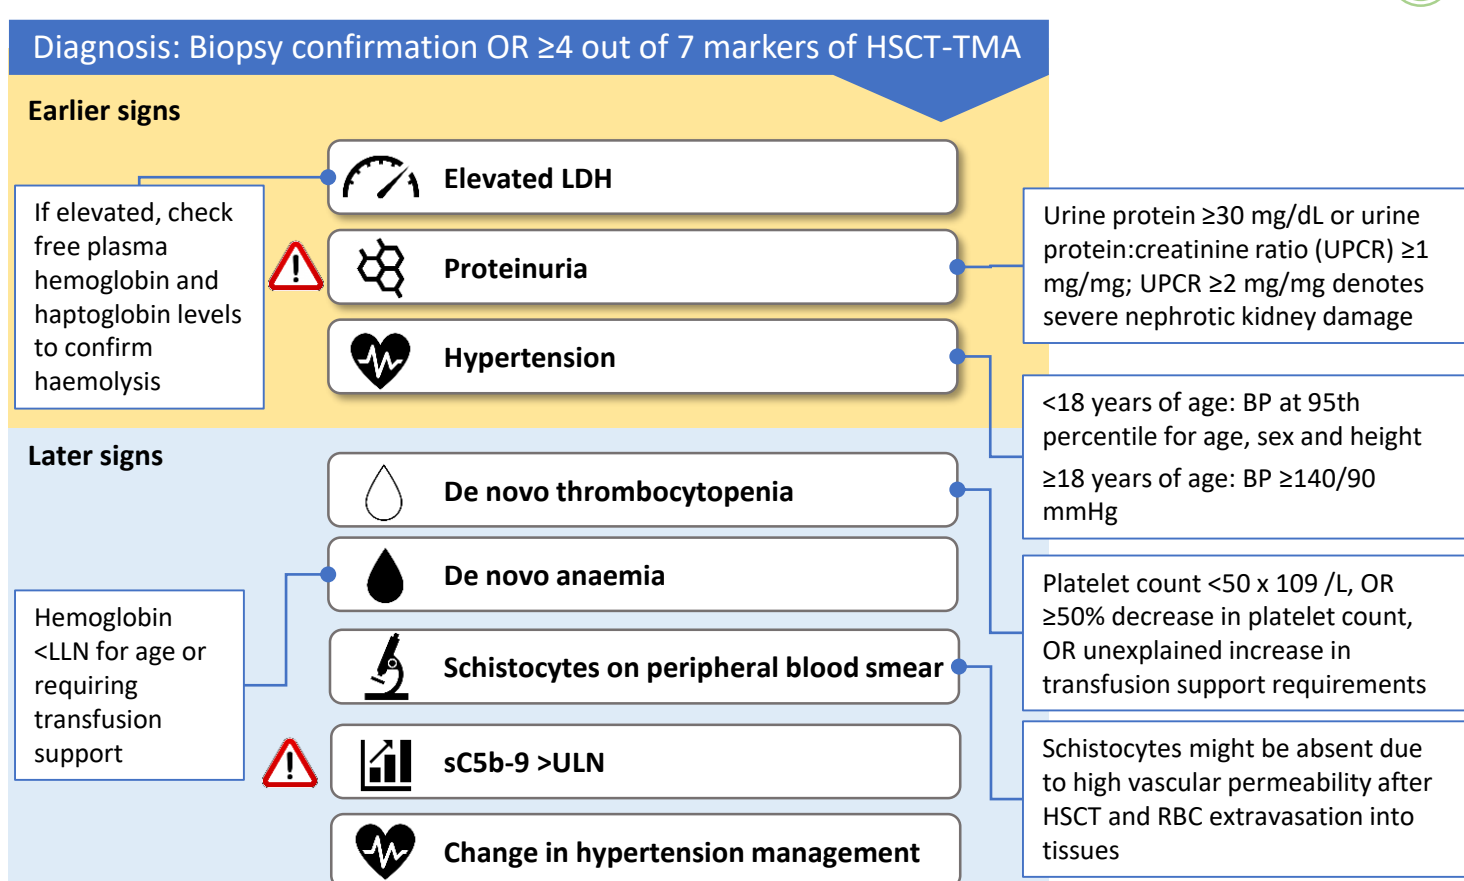

**!** = high-risk markers  
**!** Clinical suspicion should be elevated in conjunction with increased transfusion requirements before engraftment

### Organ-specific TMA signs and symptoms

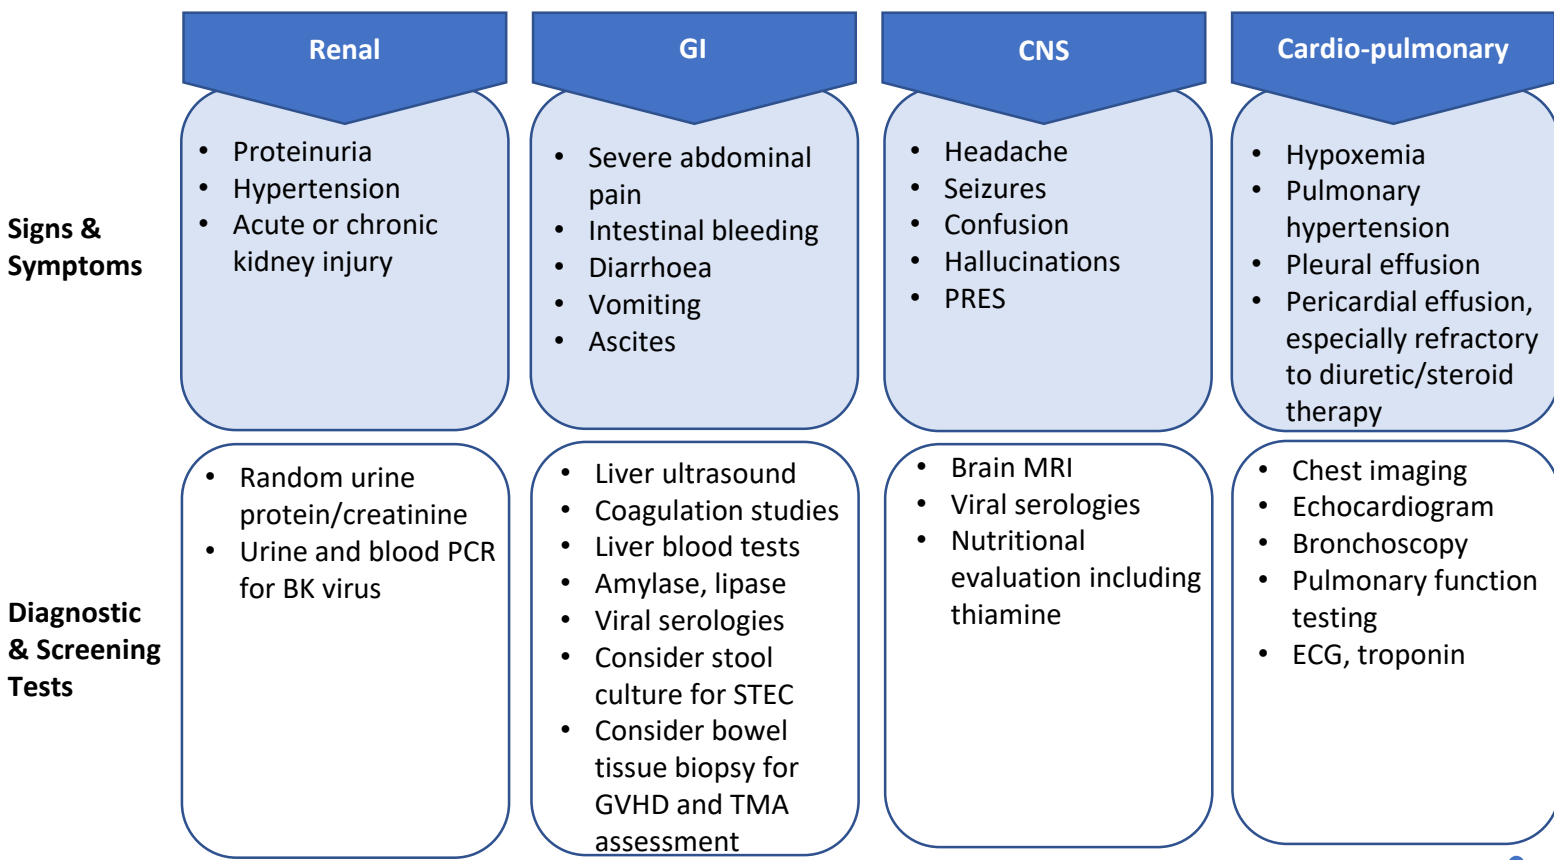

### Differential diagnoses

| Parameter                            | HSCT-TMA                                                     | SOS/VOD                                      | GvHD                                             | Drug toxicity*            | DIC                                            |
|--------------------------------------|--------------------------------------------------------------|----------------------------------------------|--------------------------------------------------|---------------------------|------------------------------------------------|
| New onset kidney injury              | Very Common (primary due to vascular injury)                 | Common (secondary to fluid overload)         | Rare                                             | Common                    | Common (secondary due to hypotension or shock) |
| New onset MAHA                       | Very Common                                                  | Rare                                         | Rare                                             | Uncommon                  | Common                                         |
| Rapidly progressing thrombocytopenia | Very Common (destruction/consumption due to microangiopathy) | Common (due to platelet consumption)         | Common                                           | Drug dependent            | Very Common                                    |
| Hypertension                         | Very Common                                                  | Rare (typically hypotension)                 | Uncommon (Drug related)                          | Drug dependent            | Rare (typically hypotension)                   |
| Seizures/PRES/CNS involvement        | Common                                                       | Uncommon (encephalopathy with liver failure) | Uncommon (no CNS GVHD)                           | Drug dependent            | Uncommon                                       |
| Icterus                              | Rare                                                         | Very Common                                  | Common with liver GVHD                           | Uncommon (Drug dependent) | Uncommon                                       |
| Liver                                | Common (transaminase elevation or indirect bilirubin)        | Very common (elevated direct bilirubin)      | Very Common (secretory diarrhea)                 | Common                    | Uncommon                                       |
| Bowel                                | Common (injury and bleeding)                                 | Uncommon                                     | Very Common                                      | Uncommon                  | Uncommon                                       |
| Skin rash/purpura                    | Common (advanced cases)                                      | Rare                                         | Very Common                                      | Very Common               | Common                                         |
| Elevated pTT/PT/INR                  | Rare                                                         | Very Common                                  | Rare                                             | Rare                      | Very Common                                    |
| CV/lung involvement                  | Common (as primary vascular injury)                          | Common (secondary due to fluid overload)     | Common (in cGVHD e.g., bronchiolitis obliterans) | Uncommon                  | Common                                         |

\*Drug toxicities includes adverse reactions to drugs commonly used in the management/post-treatment care of patients who have undergone transplantation; examples include antibiotics and immunosuppressants

BP, blood pressure; CBC, complete blood count; CNI, calcineurin inhibitor; CNS, central nervous system; CV, cardiovascular; EASIX, Endothelial Activation and Stress Index; ECG, electrocardiogram; GI, gastrointestinal; GvHD, graft versus host disease; HLA, human leukocyte antigen; HSCT, hematopoietic stem cell transplant; INR, international normalized ratio; LDH, lactate dehydrogenase; LLN, lower limit of normal; mmHg, millimetres of mercury; MRI, magnetic resonance imaging; mTORi, mammalian target of rapamycin inhibitor; PCR, polymerase chain reaction; PRES, posterior reversible encephalopathy syndrome; PT, prothrombin time; pTT, partial thromboplastin time; RBC, red blood cell; sC5b-9, soluble C5b-9; ST2, suppression of tumorigenicity 2; STEC, Shiga toxin Escherichia coli; TMA, thrombotic microangiopathy; ULN, upper limit of normal; UPCR, urine protein creatinine ratio.

The infographic represents the opinions of the authors. For a full list of declarations, including funding and author disclosure statements, please see the full text online. © The authors, CC-BY-NC [2022].
